# Supplementary material
Source: MDPI journal article supplement (https://www.mdpi.com/1999-4907/10/10/897)

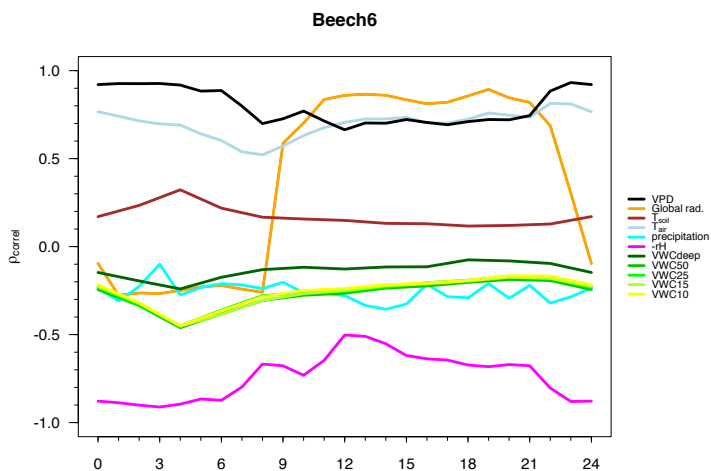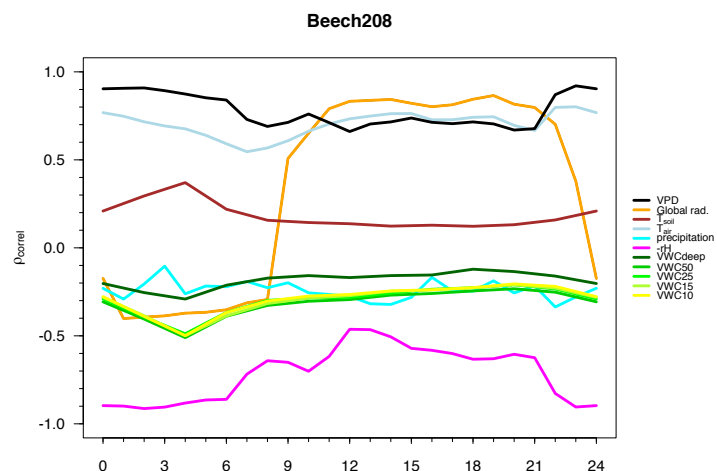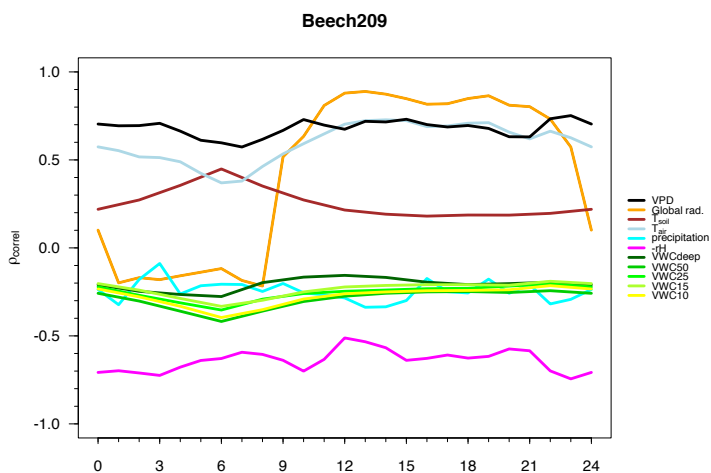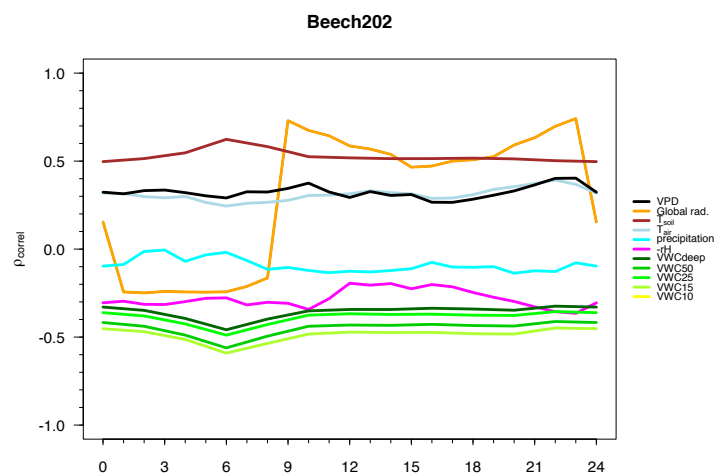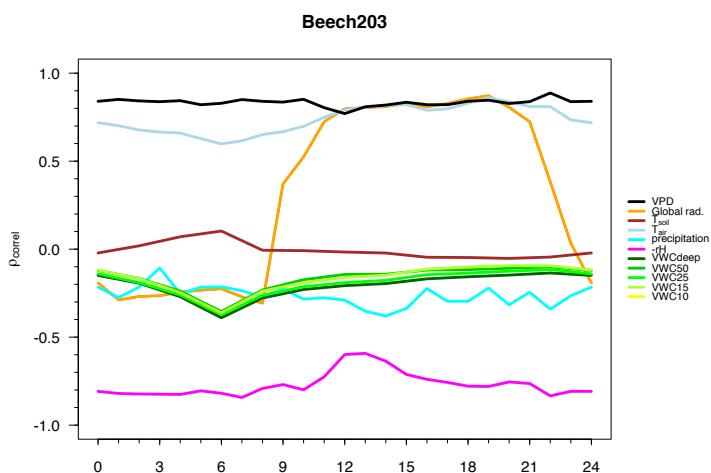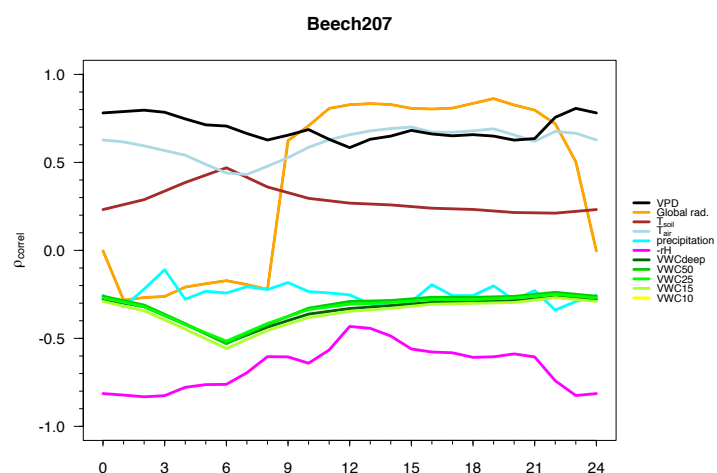

Supplement: s1 [file s1]

**Fir24**

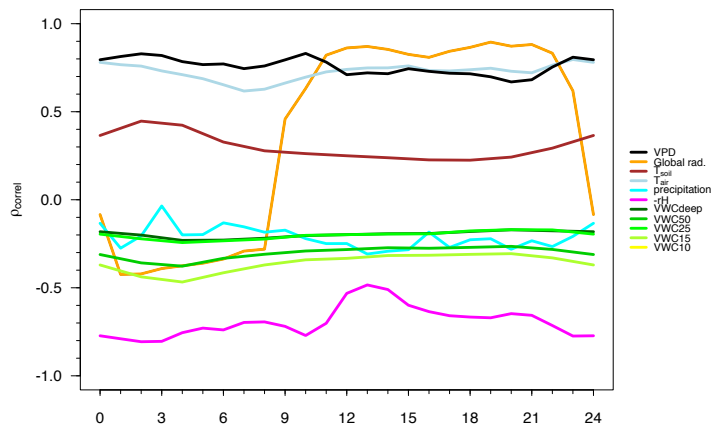

**Fir101**

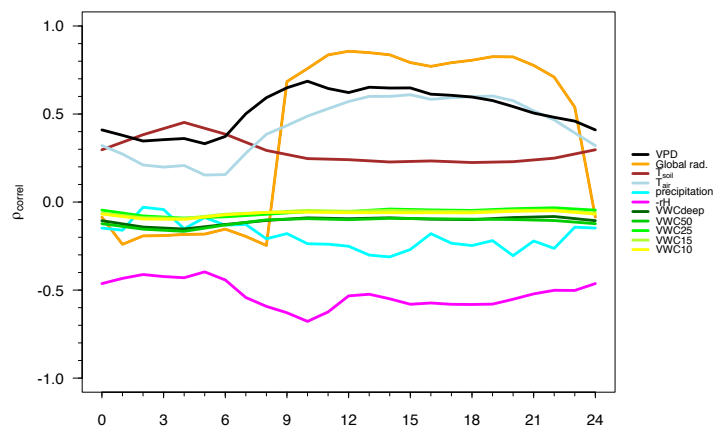

**Fir103**

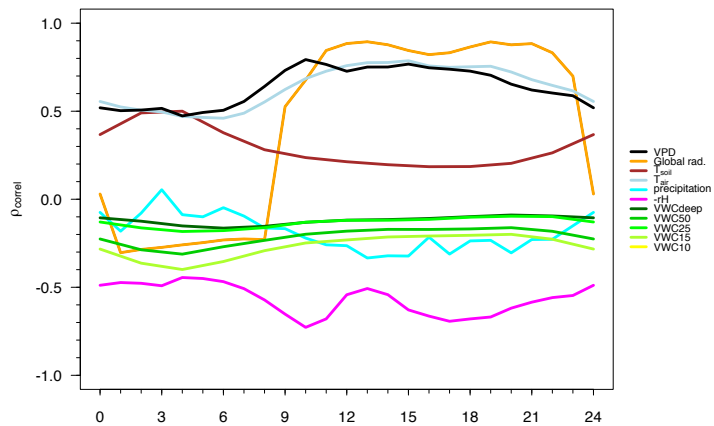

**Fir301**

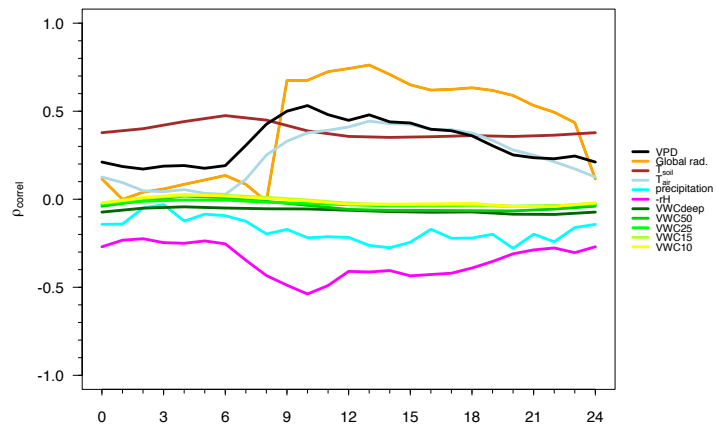

Supplement: s1 [file s1]

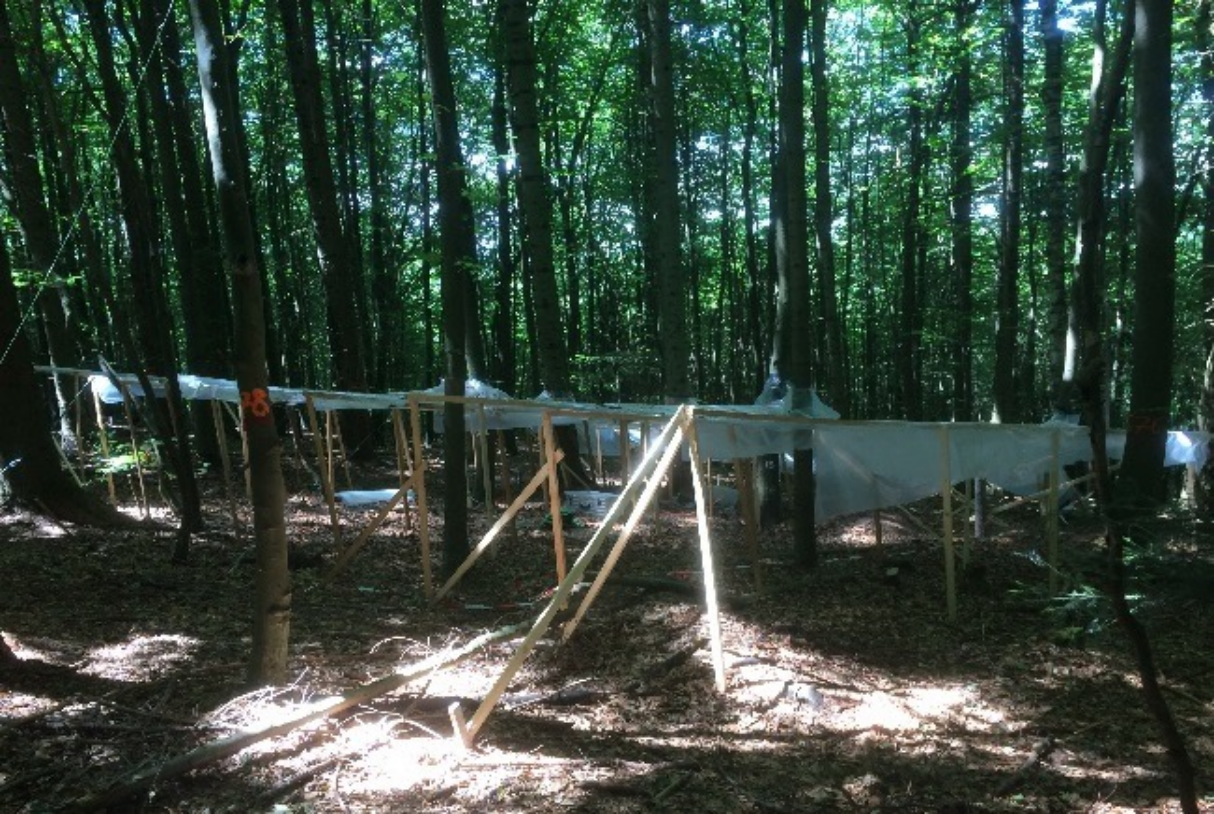

Supplement: s1 [file s1]

## Monthly averaged temperatures

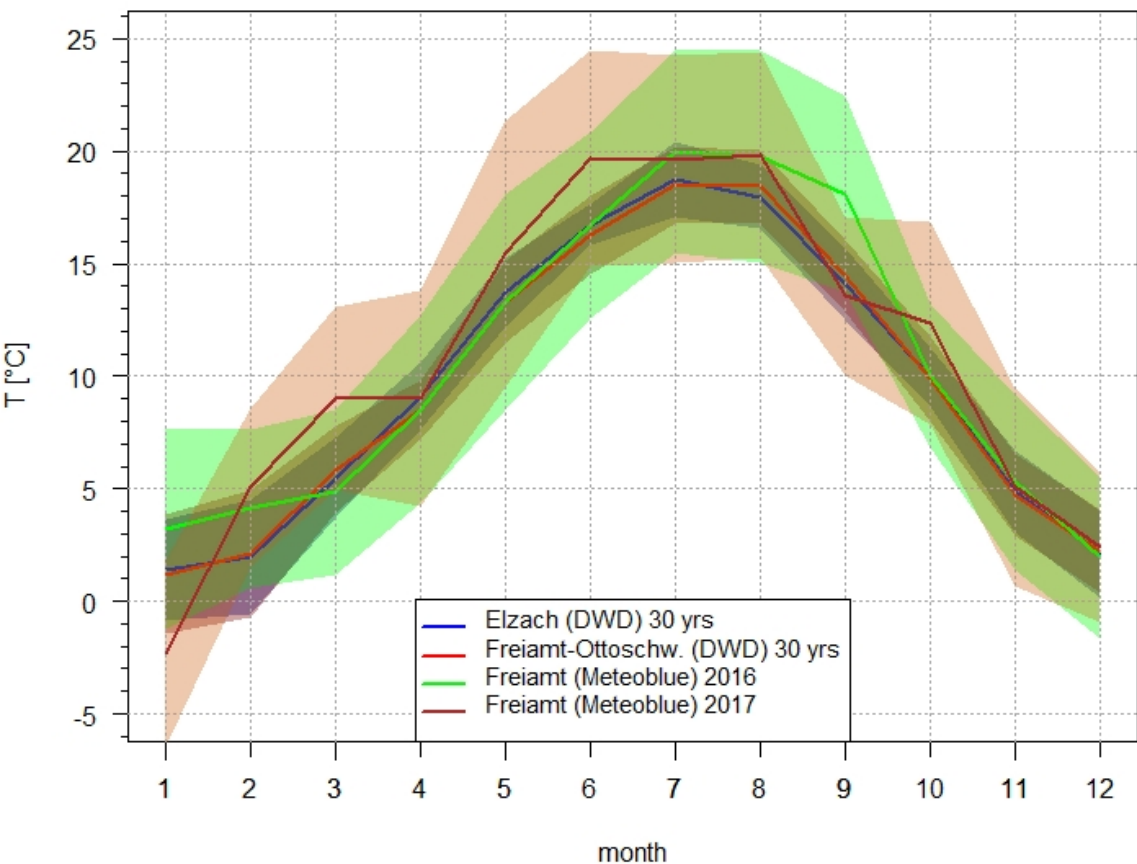

Supplement: s1 [file s1]

## Monthly averaged amount of precipitation

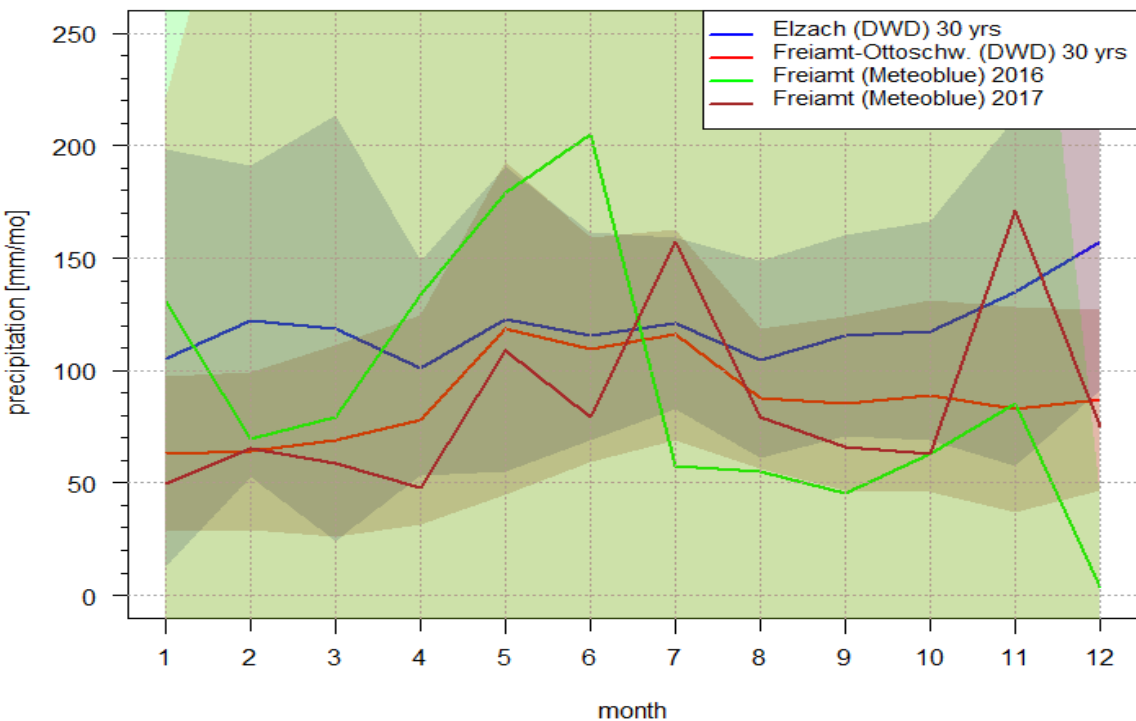

Supplement: s1 [file s1]

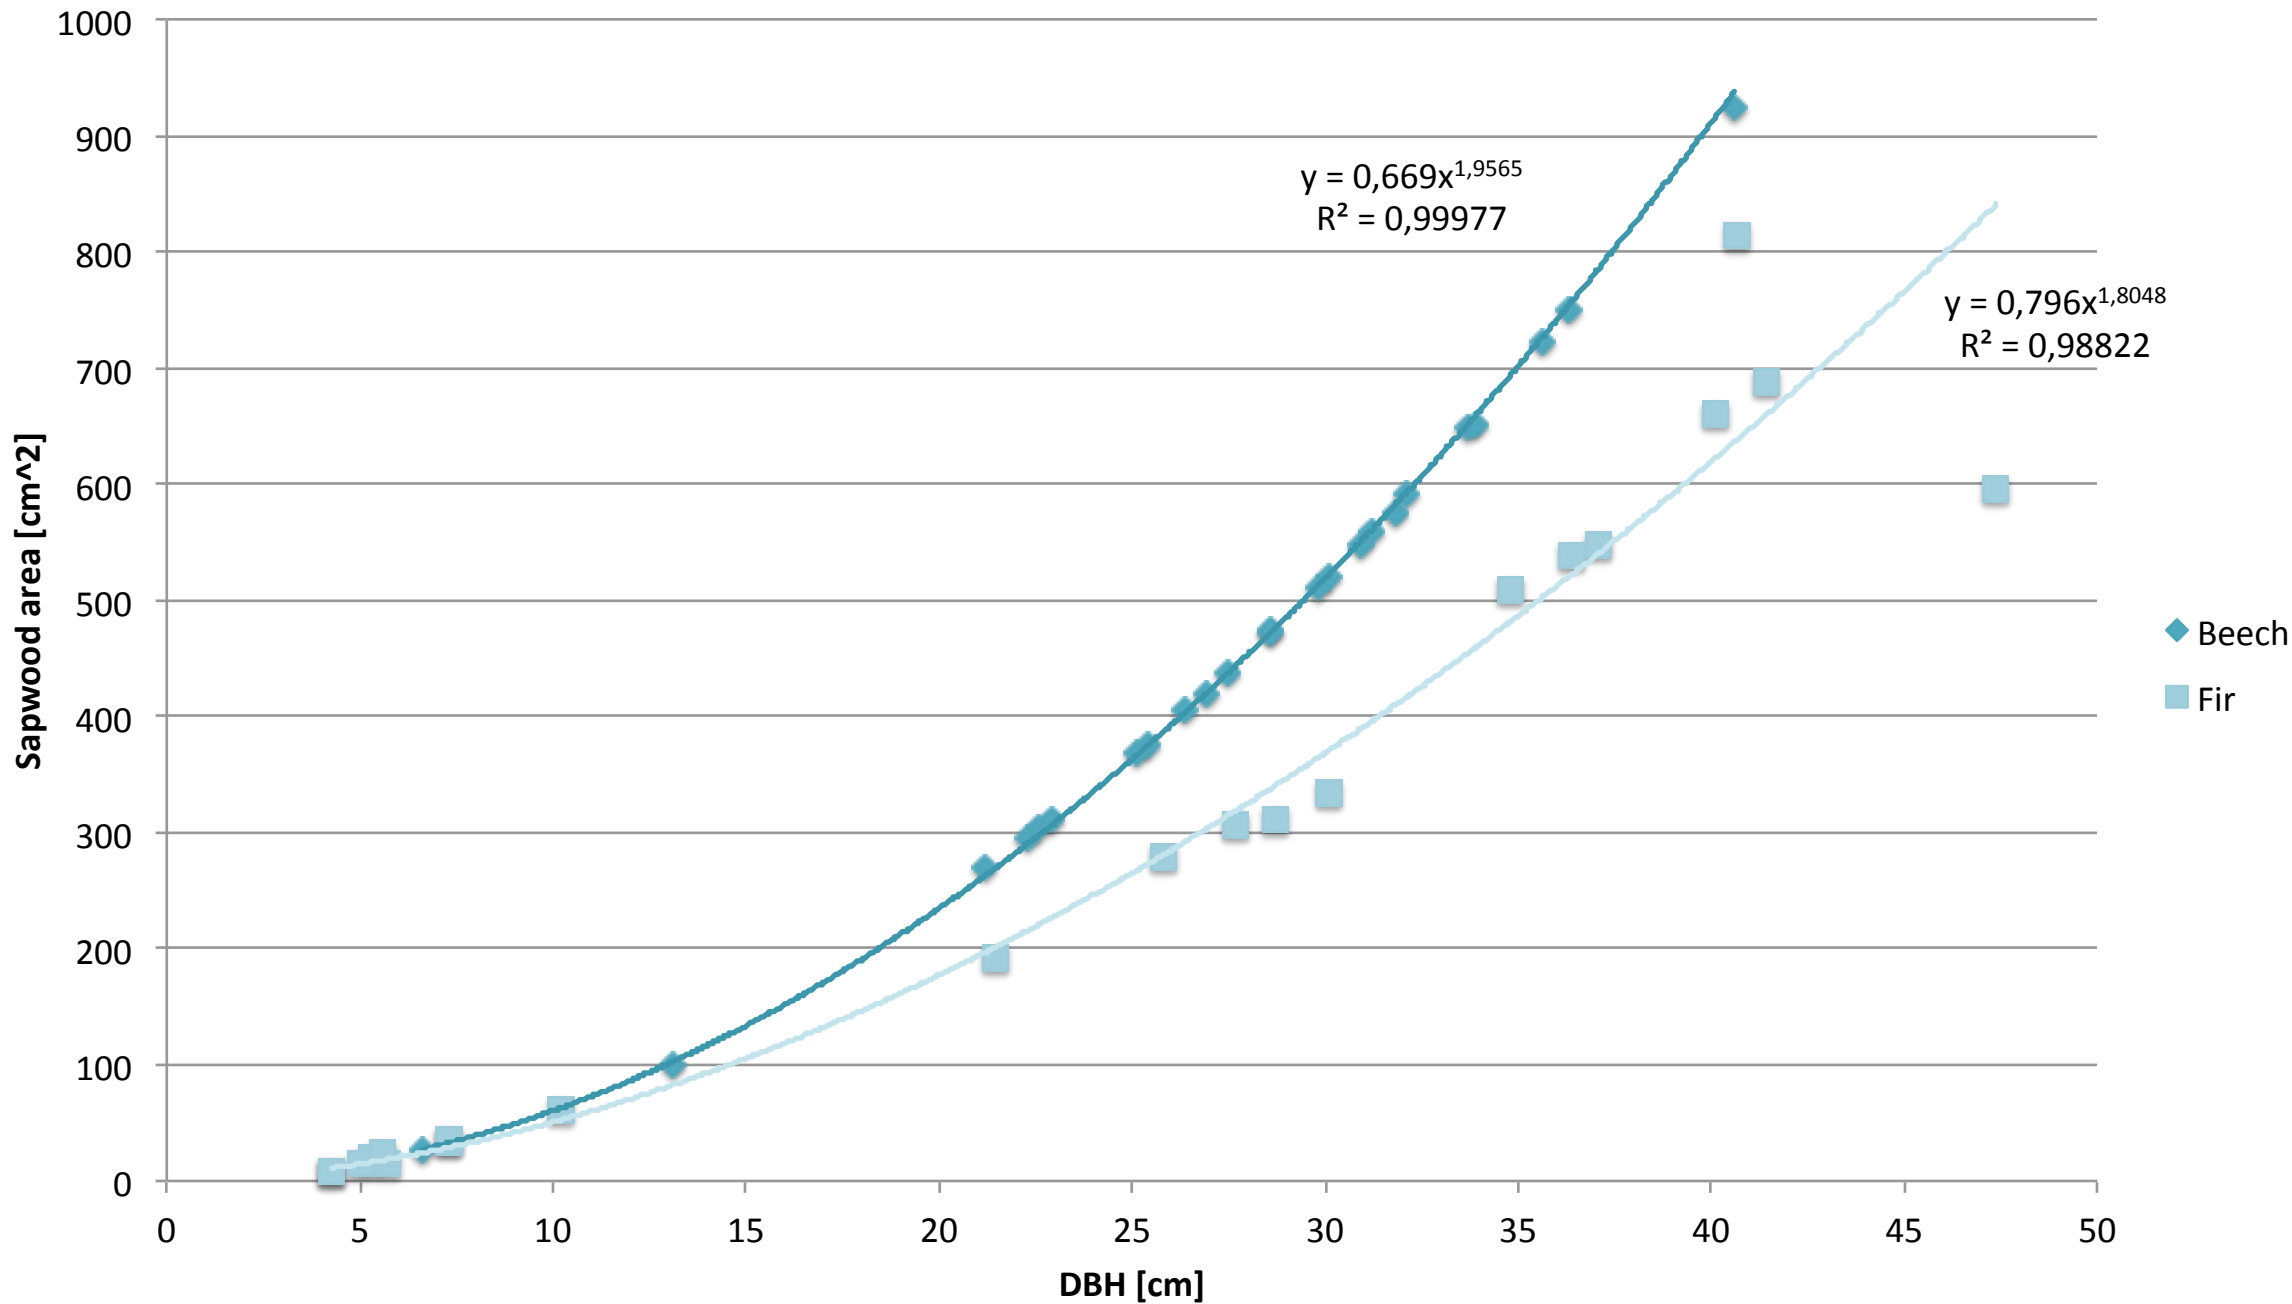

Supplement: s1 [file s1]
